# Supplementary material for: Effects of Zinc-Free Processing Aids on Silica-Reinforced Tread Compounds for Green Tires
Source: Hindawi journal article supplement (doi:10.1155/2019/9123635), 2019-06-25
Supplement: f1 [file 9123635.f1.pdf]

## Supporting Information

### Effects of Zinc-Free Processing Aids in Silica-reinforced Tread Compound for Green Tire

Sung Ho Song\*

**Table S1.** Characteristics of the ZFAs.

| Sample                                 | ZCAs  | ZFAs |
|----------------------------------------|-------|------|
| Acid Value (mg KOH/ g)                 | 142.0 | 11.9 |
| I <sub>2</sub> (mg I <sub>2</sub> / g) | 38.7  | 0.38 |
| Melting point (°C)                     | 102.5 | 57.1 |
| Ash content (%)                        | 13.2  | 0.01 |
| Zinc content (%)                       | 8.34  | 0.0  |
| Heating loss (%)                       | 0.14  | 0.21 |

**Table S2.** Formation of rubber composites with varying loading fraction of processing aids.

Unit: phr

| Materials         | Control | ZCAs<br>1 | ZCAs<br>2 | ZCAs<br>4 | ZFAs<br>1 | ZFAs<br>2 | ZFAs<br>4 | Injection<br>Material                                | Injection<br>Time            |
|-------------------|---------|-----------|-----------|-----------|-----------|-----------|-----------|------------------------------------------------------|------------------------------|
| SBR               | 80      | 80        | 80        | 80        | 80        | 80        | 80        | SBR<br>Silica<br>Master<br>Batch<br>Chemical<br>Drop | 0<br>30<br>100<br>180<br>300 |
| Silica            | 20      | 20        | 20        | 20        | 20        | 20        | 20        |                                                      |                              |
| Stearic<br>Acid   | 1       | 1         | 1         | 1         | 1         | 1         | 1         |                                                      |                              |
| Coupling<br>agent | 2       | 2         | 2         | 2         | 2         | 2         | 2         |                                                      |                              |
| ZCAs              | -       | 1         | 2         | 4         | -         | -         | -         |                                                      |                              |
| ZFAs              | -       | -         | -         | -         | 1         | 2         | 4         |                                                      |                              |
| ZnO               | 2       | 2         | 2         | 2         | 2         | 2         | 2         |                                                      |                              |
| Sulfur            | 1.75    | 1.75      | 1.75      | 1.75      | 1.75      | 1.75      | 1.75      |                                                      |                              |
| TBBS              | 1       | 1         | 1         | 1         | 1         | 1         | 1         |                                                      |                              |

Master batch: Silica with processing aids/SBR Latex

Chemical: Steric acid, sulfur, TBBS

**Table S3.** Formation of rubber composites with varying loading fraction of silica.

Unit: phr

| Materials      | Control | Silica-ZCAs 2 | Silica-ZCAs 4 | Silica-ZCAs 6 | Silica-ZFAs 2 | Silica-ZFAs 4 | Silica-ZFAs 6 | Injection Material                                |                              |
|----------------|---------|---------------|---------------|---------------|---------------|---------------|---------------|---------------------------------------------------|------------------------------|
| SBR            | 80      | 80            | 80            | 80            | 80            | 80            | 80            | SBR<br>Silica<br>Master Batch<br>Chemical<br>Drop | 0<br>30<br>100<br>180<br>300 |
| Silica         | 20      | 20            | 40            | 60            | 20            | 40            | 60            |                                                   |                              |
| Coupling agent | 2       | 2             | 2             | 2             | 2             | 2             | 2             |                                                   |                              |
| Stearic Acid   | 1       | 1             | 1             | 1             | 1             | 1             | 1             |                                                   |                              |
| ZCAs           | -       | 2             | 2             | 2             | -             | -             | -             |                                                   |                              |
| ZFAs           | -       | -             | -             | -             | 2             | 2             | 2             |                                                   |                              |
| ZnO            | 2       | 2             | 2             | 2             | 2             | 2             | 2             |                                                   |                              |
| Sulfur         | 1.75    | 1.75          | 1.75          | 1.75          | 1.75          | 1.75          | 1.75          |                                                   |                              |
| TBBS           | 1       | 1             | 1             | 1             | 1             | 1             | 1             |                                                   |                              |

Master batch: Silica with processing aids/SBR Latex

Chemical: Steric acid, sulfur, TBBS

**Table S4.** The parameter values of SBR composites with varying loading fraction of processing aids

| Materials  | $\omega$ | $\Delta C_p$ | $\Delta C_{pn}$ | $\chi_{im}$ | Tan $\delta$ | W     | C     |
|------------|----------|--------------|-----------------|-------------|--------------|-------|-------|
| ZCAs 2 phr | 0        | 0.465        | 0.490           | 2           | 1.672        | 0.840 | 0.01  |
| ZCAs 4 phr | 5        | 0.460        | 0.484           | 3.2         | 1.516        | 0.826 | 0.016 |
| ZFAs 2 phr | 5        | 0.450        | 0.474           | 5.2         | 1.386        | 0.812 | 0.033 |
| ZFAs 4 phr | 5        | 0.443        | 0.466           | 6.8         | 1.275        | 0.800 | 0.048 |

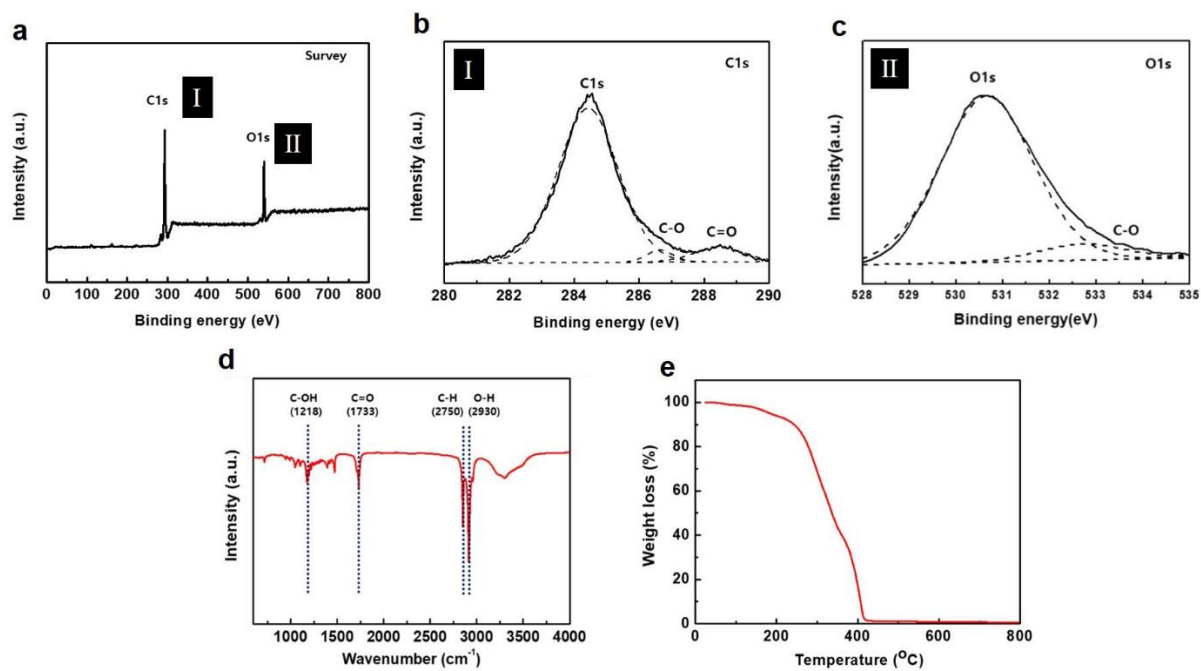

**Figure S1.** Characterization of as-prepared ZFAs.

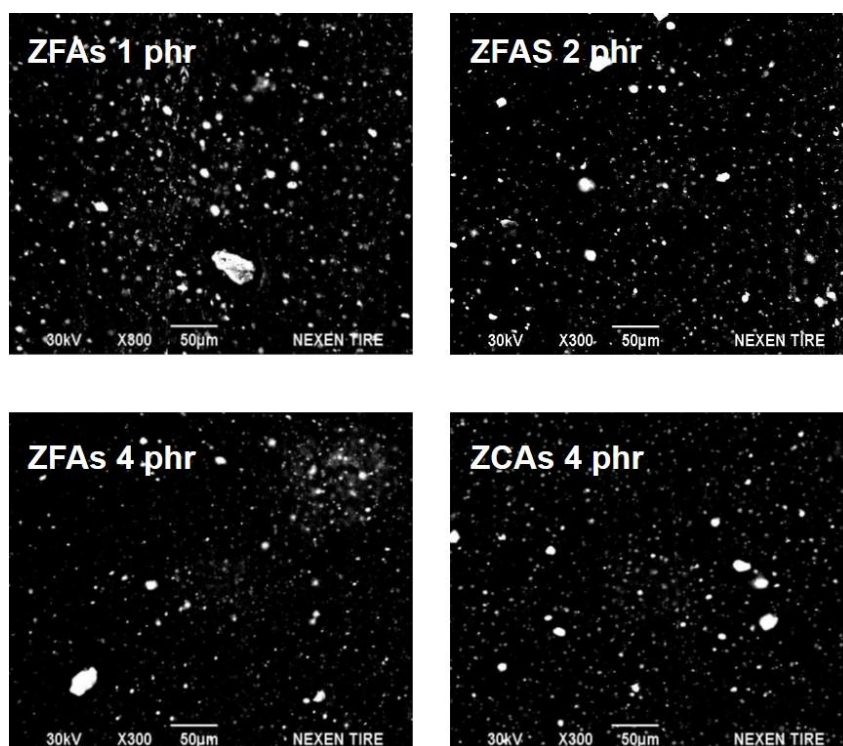

**Figure S2.** SEM images of rubber composites with varying loading fraction of ZFAs and ZCAs.

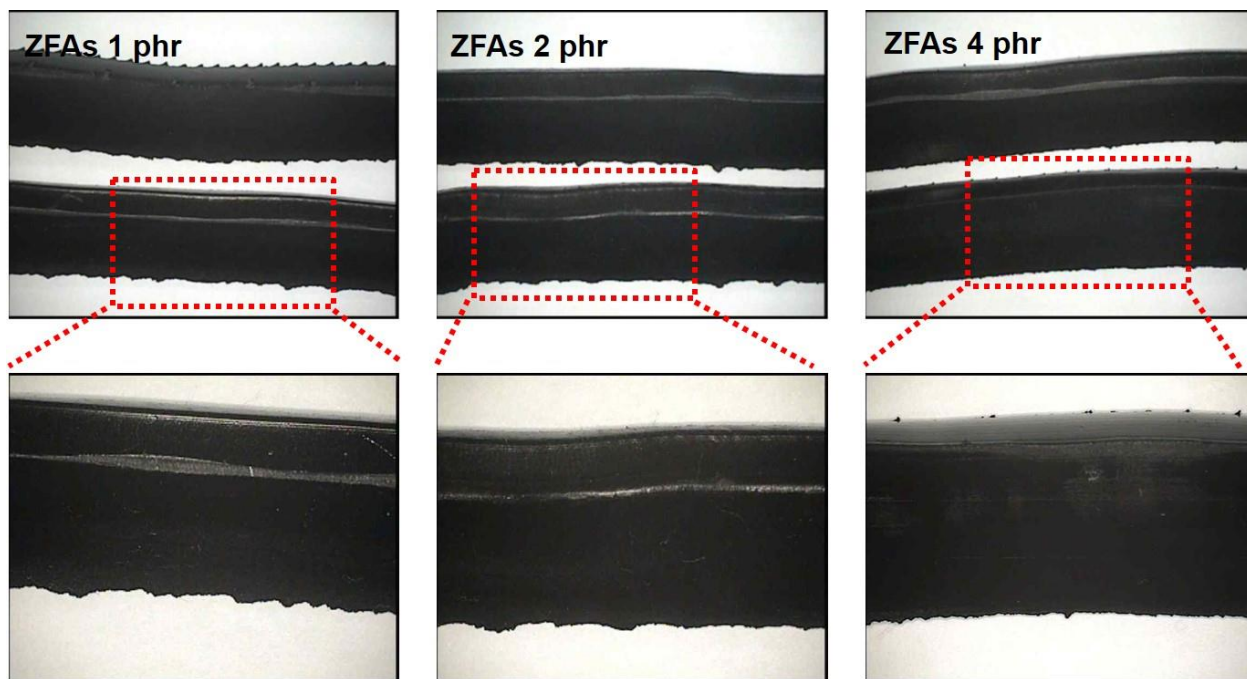

**Figure S3.** Gravel Die Extrusion images of rubber composites with varying loading fraction of ZFAs.

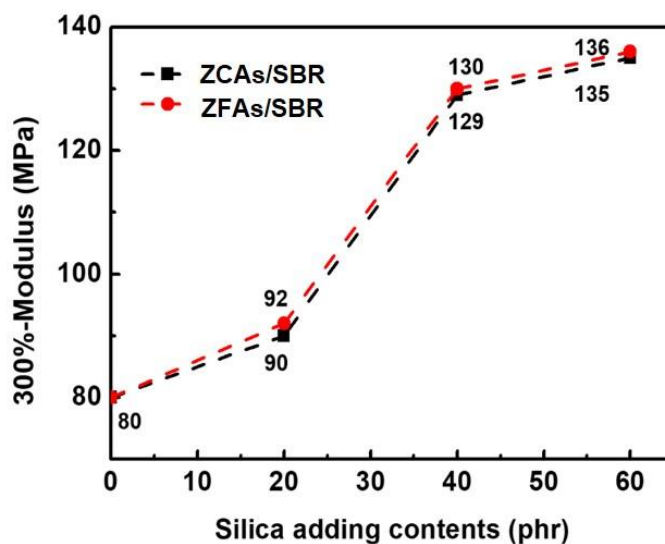

**Figure S4.** Modulus of rubber composites with ZCAs and ZFAs with varying loading fraction of silica.

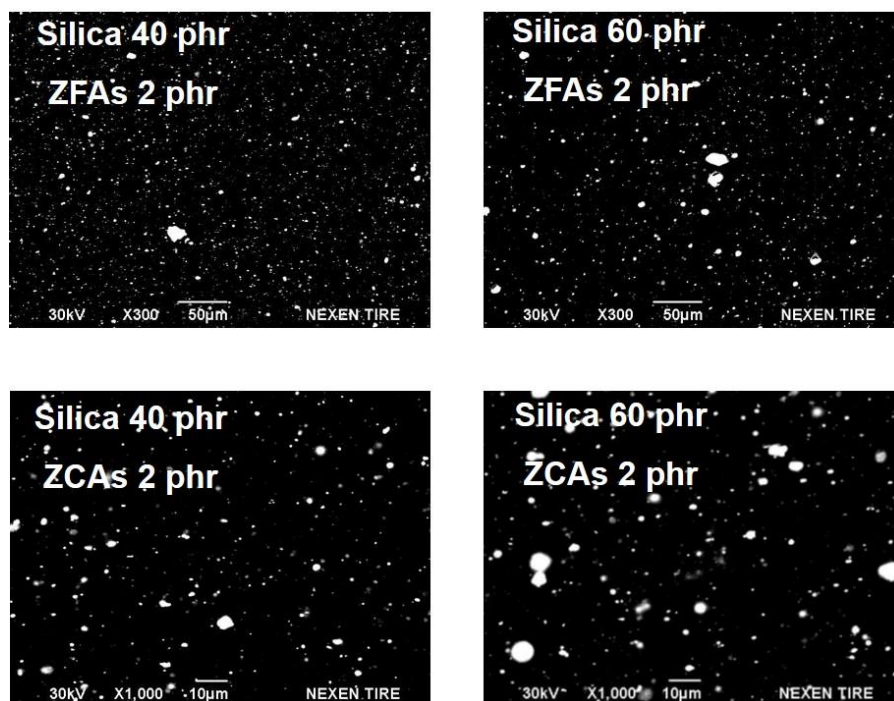

**Figure S5.** SEM images of rubber composites with ZCAs and ZFAs with varying loading fraction of silica.

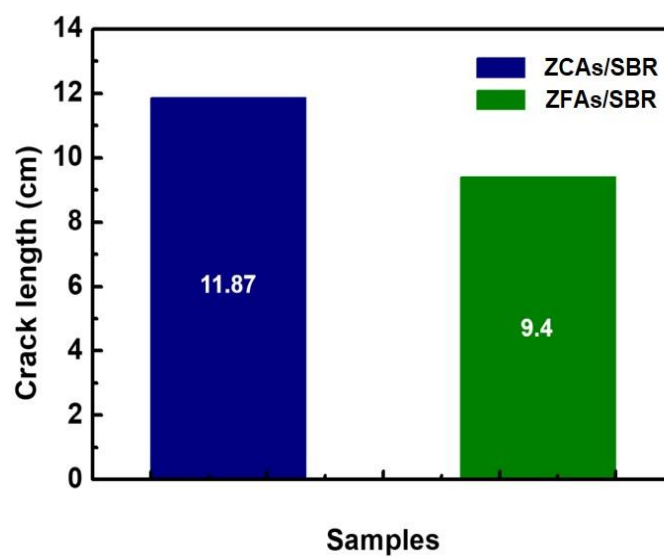

**Figure S6.** Fatigue properties of rubber composites with ZCAs and ZFAs.
